# Supplementary material for: 1H NMR based metabolic profiling of the processing effect on Rehmanniae Radix
Source: Royal Society of Chemistry journal article supplement (doi:10.1039/c3ay42119h), 2014-01-01
Supplement: c3ay42119h1.pdf [file c3ay42119h1.pdf]

## Electronic Supplementary Information for

### <sup>1</sup>H NMR based metabolic profiling of the processing effect on **Rehmanniae Radix**

Pan He<sup>a,b</sup>, Zhen-Yu Li<sup>a,\*</sup>, Jie Xing<sup>a</sup>, Xue-Mei Qin<sup>a,\*</sup>, Guan-Hua Du<sup>a,c</sup>

<sup>a</sup> Modern Research Center for Traditional Chinese Medicine of Shanxi University,  
No.92, Wucheng Road, Taiyuan 030006, Shanxi, People's Republic of China

<sup>b</sup> College of Chemistry and Chemical Engineering of Shanxi University, No.92,  
Wucheng Road, Taiyuan 030006, Shanxi, People's Republic of China

<sup>c</sup> Institute of Materia Medica, Chinese Academy of Medical Sciences, Beijing  
100050, People's Republic of China.

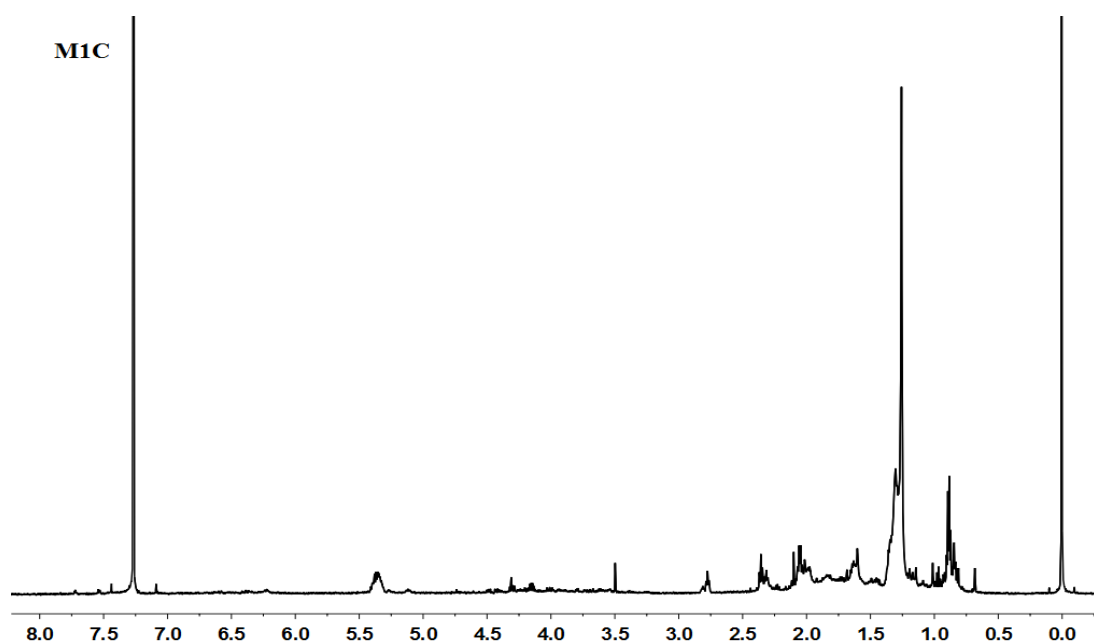

Figure S1 <sup>1</sup>H NMR spectrum of chloroform extracts of M1 procedure in the processed  
Rehmanniae Radix

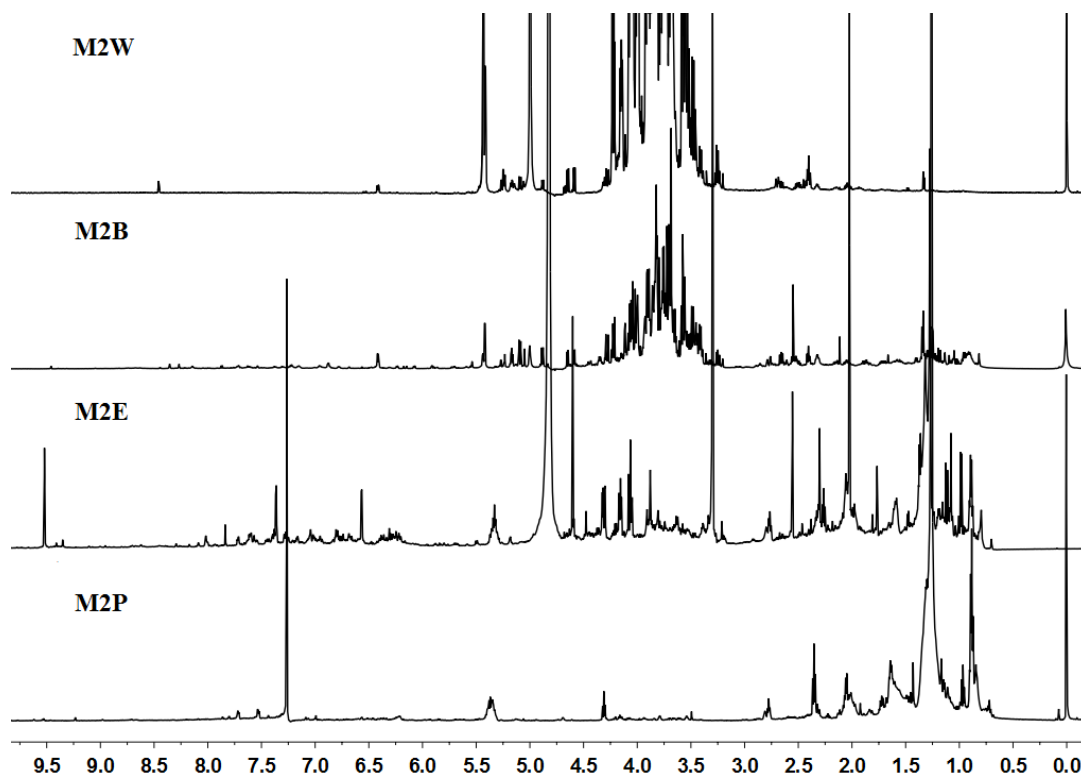

Figure S2 <sup>1</sup>H NMR spectrum of different solvent extracts of M2 procedure in the processed *Rehmanniae Radix*.
